# Supplementary material for: Direct Infusion Mass Spectrometry to Rapidly Map Metabolic Flux of Substrates Labeled with Stable Isotopes
Source: MDPI journal article supplement (doi:10.3390/metabo14050246), 2024-04-25
Supplement: s1 [file metabolites-2934871-supplementary.pdf › metabolites-2934871-supplementary.pdf]

## Supplementary information

### Supplementary Materials and Methods

#### *Generation of genome-edited cell line by CRISPR-Cas9*

In order to disrupt Pyruvate Dehydrogenase E1 Subunit Alpha 1 (PDHA1), CRISPR-Cas9 mediated genome editing was applied as previously described [25]. In brief, Cas9 and single guide RNAs (caccGATGCAGACTGTACGCCGAA and aaacTTCGGCGTACAGTCTGCATC) were simultaneously expressed using the PX458 plasmid by transient transfection using Xtremegene [26]. Transfected cells were FACS sorted and single cells were expanded. Analysis of resulting clones was done by western blotting using the following antibodies: Pyruvate Dehydrogenase (3205S; Cell Signaling Technology), glyceraldehyde 3-phosphate dehydrogenase (GAPDH) (MAB374; Merck Millipore) (Figure S1).

#### *Generation of GLS over-expressing A549 cells*

cDNAs of glutaminase (GLS) or GLS<sup>S482C</sup> (UniProt O94925, isoform 1, also known as GLS1 or KGA) were amplified by polymerase chain reaction (PCR) using the pcDNA5/FRT/TO vector as previously described and the primers aaaaaagcaggcttcggtggtatcccGCGGCATGATGCGGCTGCGAGGCTCGGGGA and aaagctgggtcggtcggtcggtcATTACAACAATCCATCAAGATTCTT [18]. The cDNAs were cloned into pEntry and shuttled to pInducer20 using standard gateway cloning [27]. A549 cells were infected with lentiviruses made with the GLS-encoding pInducer20 constructs and selected with G418.

#### *Organoid culture*

The study was approved by the responsible local ethics committees (Institutional Review Board of the University Medical Center Utrecht (STEM: 10-402/K; TcBio 14-008; Metabolic Biobank: 19-489, active since 05-06-2020). All biopsies were used after written informed consent. Intrahepatic cholangiocyte organoids were established and cultured as described previously [28]. Liver biopsies were cut into small pieces and digested using 10 mg/ml Collagenase D (Sigma Aldrich) in Hanks' Balanced Salt Solution (HyClone, Thermo Fisher Scientific) for 20 min at 37 °C. Digested samples were then diluted and washed with cold GF-(without growth factors) (Advanced DMEM/F12 (Gibco) supplemented with 2 mM GlutaMAX (Gibco), 10 mM HEPES (Gibco), 100 U/ml Pen-Strep (Gibco) and centrifuged for 5 min, 4 °C at 300 g. The cell pellet was plated in basement membrane extract (BME) (Bio-technique) and culture medium was added. Culture medium was based on Advanced DMEM/F12 supplemented with 2 mM GlutaMAX, 10 mM HEPES, 100 U/ml PenStrep, 2 % B27 without vitamin A (Gibco), 10 mM Nicotinamide (Sigma Aldrich), 1.25 mM N-Acetylcysteine (Sigma Aldrich), 10 % R-Spondin 1 (RSPO1) conditioned media (homemade), 10 nM Gastrin (Tocris), 50 ng/ml epidermal growth factor (EGF) (Peprotech), 100 ng/ml FGF10 (Peprotech), 25 ng/ml hepatocyte growth factor (HGF) (Peprotech), 50 µg/ml Primocin (InvivoGen), 5 µM A83-01 (Tocris), and 10 µM Forskolin (Tocris). For the first 3 days in culture, the medium was supplemented with 30 % Wnt conditioned media (homemade), 25 ng/ml Noggin (Peprotech), and human embryonic stem (hES) cell cloning recovery solution (Stemgent). The medium was changed every 3–4 days and organoids were passaged 1:4–1:8 each week.

### Supplementary tables

**Table S1.** Medium used for isotope tracing experiments

| Cell line        | Medium                                                                                                                                                                                 |
|------------------|----------------------------------------------------------------------------------------------------------------------------------------------------------------------------------------|
| HEK293T-WT       | DMEM, no glucose and no sodium-pyruvate (ThermoFisher Scientific) 1 % P/S (v/v) and 25 mM D-Glucose ( <sup>13</sup> C <sub>6</sub> glucose, 99%, Cambridge Isotope Laboratories, Inc.) |
| HEK293T-PDHA1-/- |                                                                                                                                                                                        |

|                                 |                                                                                                                                                                     |
|---------------------------------|---------------------------------------------------------------------------------------------------------------------------------------------------------------------|
| A549-WT                         | RPMI 1640 medium, no glutamine (ThermoFisher Scientific), 1 % P/S (v/v) and 2 mM <sup>13</sup> C <sub>5</sub> Glutamine (99%, Cambridge Isotope Laboratories, Inc.) |
| A549::pIND_GLS                  |                                                                                                                                                                     |
| A549::pIND_GLS <sup>S482C</sup> | RPMI 1640 medium, no glutamine (ThermoFisher Scientific), 1 % P/S (v/v) and 2 mM <sup>15</sup> N <sub>2</sub> Glutamine (98%, Cambridge Isotope Laboratories, Inc.) |

**Table S2.** Composition of the internal standard working solution

| Standard                                                                                                                                                                                                                                                                                                                                                                                                                                | Concentration                                                                      |
|-----------------------------------------------------------------------------------------------------------------------------------------------------------------------------------------------------------------------------------------------------------------------------------------------------------------------------------------------------------------------------------------------------------------------------------------|------------------------------------------------------------------------------------|
| <sup>15</sup> N <sub>2</sub> - <sup>13</sup> C glycine                                                                                                                                                                                                                                                                                                                                                                                  | 100 μM (Cambridge Isotope Laboratories, Buchem b.v., Apeldoorn, The Netherlands)   |
| <sup>2</sup> H <sub>4</sub> alanine, <sup>2</sup> H <sub>3</sub> leucine,<br><sup>2</sup> H <sub>3</sub> methionine, <sup>13</sup> C <sub>6</sub> phenylalanine,<br><sup>13</sup> C <sub>6</sub> tyrosine, <sup>2</sup> H <sub>3</sub> aspartate,<br><sup>2</sup> H <sub>3</sub> glutamate, <sup>2</sup> H <sub>2</sub> ornithine,<br><sup>2</sup> H <sub>2</sub> citrulline and <sup>2</sup> H <sub>4</sub> - <sup>13</sup> C arginine | 20 μM (Cambridge Isotope Laboratories, Buchem b.v., Apeldoorn, The Netherlands)    |
| <sup>2</sup> H <sub>9</sub> carnitine                                                                                                                                                                                                                                                                                                                                                                                                   | 6.08 μM (Cambridge Isotope Laboratories, Buchem b.v., Apeldoorn, The Netherlands)  |
| <sup>2</sup> H <sub>3</sub> acetylcarnitine                                                                                                                                                                                                                                                                                                                                                                                             | 1.52 μM (Cambridge Isotope Laboratories, Buchem b.v., Apeldoorn, The Netherlands)  |
| <sup>2</sup> H <sub>3</sub> palmitoylcarnitine                                                                                                                                                                                                                                                                                                                                                                                          | 0.608 μM (Cambridge Isotope Laboratories, Buchem b.v., Apeldoorn, The Netherlands) |
| <sup>2</sup> H <sub>3</sub> propionylcarnitine,<br><sup>2</sup> H <sub>3</sub> butyrylcarnitine,<br><sup>2</sup> H <sub>9</sub> isovalerylcarnitine,<br><sup>2</sup> H <sub>3</sub> octanoylcarnitine,<br><sup>2</sup> H <sub>9</sub> myristoylcarnitine                                                                                                                                                                                | 0.304 μM (Cambridge Isotope Laboratories, Buchem b.v., Apeldoorn, The Netherlands) |

**Table S3.** DI-HRMS-BIT library depicting the assigned HMDB names and corresponding adducts with m/z values used to annotate mass peaks derived from DI-HRMS in positive and negative ion modus.

| Assigned HMDB name                                                                       | [Isotopologue]      | theoretical m/z |
|------------------------------------------------------------------------------------------|---------------------|-----------------|
| <b>Glucose</b>                                                                           |                     |                 |
| D-Glucose;D-Galactose;D-Mannose;Myoinositol;3-Deoxyarabinohexonic acid;Beta-D-Glucose;D- | [M+H] <sup>+</sup>  | 181.070665      |
|                                                                                          | [M+Na] <sup>+</sup> | 203.052607      |
|                                                                                          | [M+K] <sup>+</sup>  | 219.026547      |

|                                                                                                                                                                                                                                                                                                                                                                                                                                                                      |                                                                                                              |                                                                    |
|----------------------------------------------------------------------------------------------------------------------------------------------------------------------------------------------------------------------------------------------------------------------------------------------------------------------------------------------------------------------------------------------------------------------------------------------------------------------|--------------------------------------------------------------------------------------------------------------|--------------------------------------------------------------------|
| Fructose;Allose;L-Sorbose;Alpha-D-Glucose;D-Tagatose;Beta-D-Galactose;Scyllitol;L-Gulose;L-Galactose                                                                                                                                                                                                                                                                                                                                                                 | [M-H] <sup>-</sup><br>[M+Cl] <sup>-</sup>                                                                    | 179.056112<br>215.032789                                           |
| <sup>13</sup> C <sub>6</sub> Glucose                                                                                                                                                                                                                                                                                                                                                                                                                                 | [M+H] <sup>+</sup><br>[M+Na] <sup>+</sup><br>[M+K] <sup>+</sup><br>[M-H] <sup>-</sup><br>[M+Cl] <sup>-</sup> | 187.090794<br>209.072736<br>225.046676<br>185.076241<br>221.052918 |
| <b>Glucose 6-phosphate/ Fructose 6-phosphate</b>                                                                                                                                                                                                                                                                                                                                                                                                                     |                                                                                                              |                                                                    |
| <b>Glucose 6-phosphate;Fructose 6-phosphate;Myo-inositol 1-phosphate;Galactose 1-phosphate;Dolichyl phosphate D-mannose;Fructose 1-phosphate;Mannose 6-phosphate;D-Myo-inositol 4-phosphate;Glucose 1-phosphate;Inositol phosphate;Beta-D-Glucose 6-phosphate;Beta-D-Fructose 6-phosphate;D-Tagatose 1-phosphate;D-Mannose 1-phosphate;Sorbose 1-phosphate;Beta-D-Fructose 2-phosphate;1D-myo-Inositol 3-phosphate;D-Tagatose 6-phosphate;D-fructose 1-phosphate</b> | [M-H] <sup>-</sup>                                                                                           | 259.022442                                                         |
| <sup>13</sup> C <sub>6</sub> Glucose 6-phosphate; <sup>13</sup> C <sub>6</sub> Fructose 6-phosphate                                                                                                                                                                                                                                                                                                                                                                  | [M-H] <sup>-</sup>                                                                                           | 265.042571                                                         |
| <b>Fructose 1,6-bisphosphate</b>                                                                                                                                                                                                                                                                                                                                                                                                                                     |                                                                                                              |                                                                    |
| <b>Fructose 1,6-bisphosphate;"1D-Myo-inositol 1,4-bisphosphate";"D-Fructose 2,6-bisphosphate";"Alpha-D-Glucose 1,6-bisphosphate";"1D-Myo-inositol 1,3-bisphosphate";"1D-Myo-inositol 3,4-bisphosphate";"D-Tagatose 1,6-bisphosphate";"D-Mannose 1,6-bisphosphate";"beta-D-Fructose 1,6-bisphosphate"</b>                                                                                                                                                             | [M-H] <sup>-</sup>                                                                                           | 338.988773                                                         |
| <sup>13</sup> C <sub>6</sub> Fructose 1,6-bisphosphate                                                                                                                                                                                                                                                                                                                                                                                                               | [M-H] <sup>-</sup>                                                                                           | 345.008902                                                         |
| <b>Glyceraldehyde 3-phosphate/ Dihydroxyacetone phosphate</b>                                                                                                                                                                                                                                                                                                                                                                                                        |                                                                                                              |                                                                    |
| <b>D-Glyceraldehyde 3-phosphate;Dihydroxyacetone phosphate</b>                                                                                                                                                                                                                                                                                                                                                                                                       | [M-H] <sup>-</sup>                                                                                           | 168.990748                                                         |
| <sup>13</sup> C <sub>6</sub> D-Glyceraldehyde 3-phosphate;Dihydroxyacetone phosphate                                                                                                                                                                                                                                                                                                                                                                                 | [M-H] <sup>-</sup>                                                                                           | 172.000812                                                         |
| <b>Glyceric acid 1,3-bisphosphate</b>                                                                                                                                                                                                                                                                                                                                                                                                                                |                                                                                                              |                                                                    |
| <b>Glyceric acid 1,3-bisphosphate;2,3-Diphosphoglyceric acid</b>                                                                                                                                                                                                                                                                                                                                                                                                     | [M-H] <sup>-</sup>                                                                                           | 264.951993                                                         |
| <sup>13</sup> C <sub>3</sub> Glyceric acid 1,3-bisphosphate                                                                                                                                                                                                                                                                                                                                                                                                          | [M-H] <sup>-</sup>                                                                                           | 267.962058                                                         |
| <b>2-phosphoglycerate/ 3-phosphoglycerate</b>                                                                                                                                                                                                                                                                                                                                                                                                                        |                                                                                                              |                                                                    |
| <b>2-Phosphoglyceric acid;3-Phosphoglyceric acid;2-Phospho-D-glyceric acid;(2R)-2-Hydroxy-3-(phosphonatoxy)propanoate</b>                                                                                                                                                                                                                                                                                                                                            | [M-H] <sup>-</sup>                                                                                           | 184.985663                                                         |
| <sup>13</sup> C <sub>3</sub> 2-Phosphoglyceric acid;3-Phosphoglyceric acid                                                                                                                                                                                                                                                                                                                                                                                           | [M-H] <sup>-</sup>                                                                                           | 187.995727                                                         |
| <b>Phosphoenolpyruvic acid</b>                                                                                                                                                                                                                                                                                                                                                                                                                                       |                                                                                                              |                                                                    |
| Phosphoenolpyruvic acid                                                                                                                                                                                                                                                                                                                                                                                                                                              | [M-H] <sup>-</sup>                                                                                           | 166.975098                                                         |
| <sup>13</sup> C <sub>3</sub> Phosphoenolpyruvic acid                                                                                                                                                                                                                                                                                                                                                                                                                 | [M-H] <sup>-</sup>                                                                                           | 169.985163                                                         |
| <b>Pyruvate</b>                                                                                                                                                                                                                                                                                                                                                                                                                                                      |                                                                                                              |                                                                    |
| <b>Pyruvic acid;Malonic semialdehyde</b>                                                                                                                                                                                                                                                                                                                                                                                                                             | [M-H] <sup>-</sup>                                                                                           | 87.008768                                                          |
| <sup>13</sup> C <sub>3</sub> Pyruvic acid                                                                                                                                                                                                                                                                                                                                                                                                                            | [M-H] <sup>-</sup>                                                                                           | 90.018833                                                          |
| <b>Lactate</b>                                                                                                                                                                                                                                                                                                                                                                                                                                                       |                                                                                                              |                                                                    |

|                                                                                                                                                       |                     |            |
|-------------------------------------------------------------------------------------------------------------------------------------------------------|---------------------|------------|
| <b>L-Lactic acid</b> ;Hydroxypropionic acid;Glyceraldehyde;D-Lactic acid;Dihydroxyacetone;Methoxyacetic acid                                          | [M-H] <sup>-</sup>  | 89.024418  |
| <sup>13</sup> C <sup>3</sup> L-Lactic acid                                                                                                            | [M-H] <sup>-</sup>  | 92.034483  |
| <b>Glycerol 3-phosphate</b>                                                                                                                           |                     |            |
| <b>Glycerol 3-phosphate</b> ;Beta-Glycerophosphoric acid                                                                                              | [M-H] <sup>-</sup>  | 171.006398 |
| <sup>13</sup> C <sup>3</sup> Glycerol 3-phosphate                                                                                                     | [M-H] <sup>-</sup>  | 174.016463 |
| <b>Phosphohydroxypyruvate</b>                                                                                                                         |                     |            |
| <b>Phosphohydroxypyruvic acid</b> ;3-Phosphonatooxypyruvate                                                                                           | [M-H] <sup>-</sup>  | 182.970013 |
| <sup>13</sup> C <sup>3</sup> Phosphohydroxypyruvic acid                                                                                               | [M-H] <sup>-</sup>  | 185.980077 |
| <b>Phosphoserine</b>                                                                                                                                  |                     |            |
| <b>Phosphoserine</b>                                                                                                                                  | [M+H] <sup>+</sup>  | 186.016110 |
|                                                                                                                                                       | [M-H] <sup>-</sup>  | 184.001647 |
| <sup>13</sup> C <sup>3</sup> Phosphoserine                                                                                                            | [M+H] <sup>+</sup>  | 189.026264 |
|                                                                                                                                                       | [M-H] <sup>-</sup>  | 187.011712 |
| <b>Serine</b>                                                                                                                                         |                     |            |
| <b>Serine</b>                                                                                                                                         | [M+H] <sup>+</sup>  | 106.049870 |
|                                                                                                                                                       | [M+Na] <sup>+</sup> | 128.031812 |
|                                                                                                                                                       | [M+K] <sup>+</sup>  | 144.005752 |
|                                                                                                                                                       | [M-H] <sup>-</sup>  | 104.035317 |
| <sup>13</sup> C <sup>3</sup> Serine                                                                                                                   | [M+H] <sup>+</sup>  | 109.059934 |
|                                                                                                                                                       | [M+Na] <sup>+</sup> | 131.041877 |
|                                                                                                                                                       | [M+K] <sup>+</sup>  | 147.015817 |
|                                                                                                                                                       | [M-H] <sup>-</sup>  | 107.045381 |
| <b>L-Acetylcarnitine</b>                                                                                                                              |                     |            |
| <b>L-Acetylcarnitine</b>                                                                                                                              | [M+H] <sup>+</sup>  | 204.123034 |
| <sup>13</sup> C <sup>2</sup> L-Acetylcarnitine                                                                                                        | [M+H] <sup>+</sup>  | 206.129744 |
| <b>Citrate</b>                                                                                                                                        |                     |            |
| <b>Citric acid</b> ;Isocitric acid;D-threo-Isocitric acid;Diketogulonic acid;"2,3-Diketo-L-gulonate";"(1R,2R)-Isocitric acid";"D-Glucaro-1,4-lactone" | [M-H] <sup>-</sup>  | 191.019726 |
| <sup>13</sup> C <sup>2</sup> Citrate                                                                                                                  | [M-H] <sup>-</sup>  | 193.026436 |
| <sup>13</sup> C <sup>3</sup> Citrate                                                                                                                  | [M-H] <sup>-</sup>  | 194.029791 |
| <sup>13</sup> C <sup>4</sup> Citrate                                                                                                                  | [M-H] <sup>-</sup>  | 195.033146 |
| <sup>13</sup> C <sup>5</sup> Citrate                                                                                                                  | [M-H] <sup>-</sup>  | 196.036500 |
| <sup>13</sup> C <sup>6</sup> Citrate                                                                                                                  | [M-H] <sup>-</sup>  | 197.039855 |
| <b>2-oxoglutarate</b>                                                                                                                                 |                     |            |
| <b>2-oxoglutarate</b>                                                                                                                                 | [M-H] <sup>-</sup>  | 145.014248 |
| <sup>13</sup> C <sup>2</sup> 2-oxoglutarate                                                                                                           | [M-H] <sup>-</sup>  | 147.020957 |
| <sup>13</sup> C <sup>3</sup> 2-oxoglutarate                                                                                                           | [M-H] <sup>-</sup>  | 148.024311 |
| <sup>13</sup> C <sup>4</sup> 2-oxoglutarate                                                                                                           | [M-H] <sup>-</sup>  | 149.027666 |
| <sup>13</sup> C <sup>5</sup> 2-oxoglutarate                                                                                                           | [M-H] <sup>-</sup>  | 150.031021 |
| <b>Succinate</b>                                                                                                                                      |                     |            |
| <b>Succinate</b> ;Methylmalonic acid;Erythrono-1,4-lactone;Threonolactone                                                                             | [M-H] <sup>-</sup>  | 117.019332 |
| <sup>13</sup> C <sup>2</sup> Succinate                                                                                                                | [M-H] <sup>-</sup>  | 119.026042 |
| <sup>13</sup> C <sup>3</sup> Succinate                                                                                                                | [M-H] <sup>-</sup>  | 120.029397 |
| <sup>13</sup> C <sup>4</sup> Succinate                                                                                                                | [M-H] <sup>-</sup>  | 121.032752 |
| <b>Fumarate</b>                                                                                                                                       |                     |            |

|                                                                    |                     |             |
|--------------------------------------------------------------------|---------------------|-------------|
| <b>Fumarate;Maleic acid</b>                                        | [M-H] <sup>-</sup>  | 115.003682  |
| <sup>13</sup> C <sup>2</sup> Fumarate                              | [M-H] <sup>-</sup>  | 117.009858  |
| <sup>13</sup> C <sup>3</sup> Fumarate                              | [M-H] <sup>-</sup>  | 118.013918  |
| <sup>13</sup> C <sup>4</sup> Fumarate                              | [M-H] <sup>-</sup>  | 119.017375  |
| <b>Malate</b>                                                      |                     |             |
| Malate                                                             | [M-H] <sup>-</sup>  | 133.014247  |
| <sup>13</sup> C <sup>2</sup> Malate                                | [M-H] <sup>-</sup>  | 135.020957  |
| <sup>13</sup> C <sup>3</sup> Malate                                | [M-H] <sup>-</sup>  | 136.024311  |
| <sup>13</sup> C <sup>4</sup> Malate                                | [M-H] <sup>-</sup>  | 137.027666  |
| <b>Aspartate</b>                                                   |                     |             |
| <b>L-Aspartate;D-Aspartate;Iminodiacetic acid</b>                  | [M+Na] <sup>+</sup> | 156.026727  |
|                                                                    | [M-H] <sup>-</sup>  | 132.030231  |
|                                                                    | [M+Cl] <sup>-</sup> | 168.006909  |
| <sup>13</sup> C <sup>2</sup> L-Aspartate                           | [M+Na] <sup>+</sup> | 158.033436  |
|                                                                    | [M-H] <sup>-</sup>  | 134.036941  |
|                                                                    | [M+Cl] <sup>-</sup> | 170.013618  |
| <sup>13</sup> C <sup>3</sup> L-Aspartate                           | [M+Na] <sup>+</sup> | 159.036791  |
|                                                                    | [M-H] <sup>-</sup>  | 135.040296  |
|                                                                    | [M+Cl] <sup>-</sup> | 171.016973  |
| <sup>13</sup> C <sup>4</sup> L-Aspartate                           | [M+Na] <sup>+</sup> | 160.040146  |
|                                                                    | [M-H] <sup>-</sup>  | 136.043651  |
|                                                                    | [M+Cl] <sup>-</sup> | 172.020328  |
| <sup>15</sup> N <sup>1</sup> L-Aspartate                           | [M+Na] <sup>+</sup> | 157.023762  |
|                                                                    | [M-H] <sup>-</sup>  | 133.027266  |
|                                                                    | [M+Cl] <sup>-</sup> | 169.003944  |
| <b>Glutamine</b>                                                   |                     |             |
| <b>L-Glutamine;Ureidoisobutyric acid;D-Glutamine;Alanylglycine</b> | [M+H] <sup>+</sup>  | 147.076419  |
|                                                                    | [M+Na] <sup>+</sup> | 169.058361  |
|                                                                    | [M+K] <sup>+</sup>  | 185.032301  |
|                                                                    | [M-H] <sup>-</sup>  | 145.0618657 |
|                                                                    | [M+Cl] <sup>-</sup> | 181.0385432 |
| <sup>13</sup> C <sup>2</sup> L-Glutamine                           | [M+H] <sup>+</sup>  | 149.0831287 |
|                                                                    | [M+Na] <sup>+</sup> | 171.0650707 |
|                                                                    | [M+K] <sup>+</sup>  | 187.0390107 |
|                                                                    | [M-H] <sup>-</sup>  | 147.0685754 |
|                                                                    | [M+Cl] <sup>-</sup> | 183.0452529 |
| <sup>13</sup> C <sup>3</sup> L-Glutamine                           | [M+H] <sup>+</sup>  | 150.0864835 |
|                                                                    | [M+Na] <sup>+</sup> | 172.0684255 |
|                                                                    | [M+K] <sup>+</sup>  | 188.0423655 |
|                                                                    | [M-H] <sup>-</sup>  | 148.0719302 |
|                                                                    | [M+Cl] <sup>-</sup> | 184.0486077 |
| <sup>13</sup> C <sup>4</sup> L-Glutamine                           | [M+H] <sup>+</sup>  | 151.0898384 |
|                                                                    | [M+Na] <sup>+</sup> | 173.0717804 |
|                                                                    | [M+K] <sup>+</sup>  | 189.0457204 |
|                                                                    | [M-H] <sup>-</sup>  | 149.0752851 |
|                                                                    | [M+Cl] <sup>-</sup> | 185.0519626 |
| <sup>13</sup> C <sup>5</sup> L-Glutamine                           | [M+H] <sup>+</sup>  | 152.0931932 |
|                                                                    | [M+Na] <sup>+</sup> | 174.0751352 |
|                                                                    | [M+K] <sup>+</sup>  | 190.0490752 |
|                                                                    | [M-H] <sup>-</sup>  | 150.0786399 |

|                                                                                                                                |                     |             |
|--------------------------------------------------------------------------------------------------------------------------------|---------------------|-------------|
|                                                                                                                                | [M+Cl] <sup>-</sup> | 186.0553174 |
| <sup>15</sup> N <sup>1</sup> L-Glutamine                                                                                       | [M+H] <sup>+</sup>  | 148.0734539 |
|                                                                                                                                | [M+Na] <sup>+</sup> | 170.0553959 |
|                                                                                                                                | [M+K] <sup>+</sup>  | 186.0293359 |
|                                                                                                                                | [M-H] <sup>-</sup>  | 146.0589006 |
|                                                                                                                                | [M+Cl] <sup>-</sup> | 182.0355781 |
| <sup>15</sup> N <sup>2</sup> L-Glutamine                                                                                       | [M+H] <sup>+</sup>  | 149.0704888 |
|                                                                                                                                | [M+Na] <sup>+</sup> | 171.0524308 |
|                                                                                                                                | [M+K] <sup>+</sup>  | 187.0263708 |
|                                                                                                                                | [M-H] <sup>-</sup>  | 147.0559355 |
|                                                                                                                                | [M+Cl] <sup>-</sup> | 183.0326130 |
| <b>Glutamate</b>                                                                                                               |                     |             |
| <b>L-Glutamic acid</b> ;N-Methyl-D-aspartic acid;N-Acetylserine;D-Glutamic acid;L-4-Hydroxyglutamate semialdehyde;DL-Glutamate | [M+H] <sup>+</sup>  | 148.060434  |
|                                                                                                                                | [M+Na] <sup>+</sup> | 170.042377  |
|                                                                                                                                | [M+K] <sup>+</sup>  | 186.016317  |
|                                                                                                                                | [M-H] <sup>-</sup>  | 146.045881  |
|                                                                                                                                | [M+Cl] <sup>-</sup> | 182.022559  |
| <sup>13</sup> C <sup>2</sup> L-Glutamic acid                                                                                   | [M+H] <sup>+</sup>  | 150.067144  |
|                                                                                                                                | [M+Na] <sup>+</sup> | 172.049086  |
|                                                                                                                                | [M+K] <sup>+</sup>  | 188.023026  |
|                                                                                                                                | [M-H] <sup>-</sup>  | 148.052591  |
|                                                                                                                                | [M+Cl] <sup>-</sup> | 184.029268  |
| <sup>13</sup> C <sup>3</sup> L-Glutamic acid                                                                                   | [M+H] <sup>+</sup>  | 151.070499  |
|                                                                                                                                | [M+Na] <sup>+</sup> | 173.052441  |
|                                                                                                                                | [M+K] <sup>+</sup>  | 189.026381  |
|                                                                                                                                | [M-H] <sup>-</sup>  | 149.055946  |
|                                                                                                                                | [M+Cl] <sup>-</sup> | 185.032623  |
| <sup>13</sup> C <sup>4</sup> L-Glutamic acid                                                                                   | [M+H] <sup>+</sup>  | 152.073854  |
|                                                                                                                                | [M+Na] <sup>+</sup> | 174.055796  |
|                                                                                                                                | [M+K] <sup>+</sup>  | 190.029736  |
|                                                                                                                                | [M-H] <sup>-</sup>  | 150.059301  |
|                                                                                                                                | [M+Cl] <sup>-</sup> | 186.035978  |
| <sup>13</sup> C <sup>5</sup> L-Glutamic acid                                                                                   | [M+H] <sup>+</sup>  | 153.077208  |
|                                                                                                                                | [M+Na] <sup>+</sup> | 175.059151  |
|                                                                                                                                | [M+K] <sup>+</sup>  | 191.033091  |
|                                                                                                                                | [M-H] <sup>-</sup>  | 151.062656  |
|                                                                                                                                | [M+Cl] <sup>-</sup> | 187.039333  |
| <sup>15</sup> N <sup>1</sup> L-Glutamic acid                                                                                   | [M+H] <sup>+</sup>  | 149.057469  |
|                                                                                                                                | [M+Na] <sup>+</sup> | 171.039412  |
|                                                                                                                                | [M+K] <sup>+</sup>  | 187.013352  |
|                                                                                                                                | [M-H] <sup>-</sup>  | 147.042916  |
|                                                                                                                                | [M+Cl] <sup>-</sup> | 183.019594  |
| <b>Beta-alanine/ L-Alanine</b>                                                                                                 |                     |             |
| <b>Beta-alanine</b> ;L-Alanine;Sarcosine;D-Alanine;Ethyl carbamate                                                             | [M-H] <sup>-</sup>  | 88.040402   |
| <sup>13</sup> C <sup>2</sup> Beta-Alanine/ <sup>13</sup> C <sup>2</sup> L-Alanine                                              | [M-H] <sup>-</sup>  | 90.047112   |
| <sup>13</sup> C <sup>3</sup> Beta-Alanine/ <sup>13</sup> C <sup>3</sup> L-Alanine                                              | [M-H] <sup>-</sup>  | 91.050467   |
| <sup>15</sup> N <sup>1</sup> Beta-Alanine/ <sup>15</sup> N <sup>1</sup> L-Alanine                                              | [M-H] <sup>-</sup>  | 89.037437   |
| <b>L-Asparagine</b>                                                                                                            |                     |             |
| <b>L-Asparagine</b> ;Ureidopropionic acid; Glycyl-glycine;N-Carbamoylsarcosine;D-Asparagine                                    | [M+H] <sup>+</sup>  | 133.060769  |
|                                                                                                                                | [M+Na] <sup>+</sup> | 155.042711  |

|                                                                                                           |                     |            |
|-----------------------------------------------------------------------------------------------------------|---------------------|------------|
|                                                                                                           | [M+K] <sup>+</sup>  | 171.016651 |
|                                                                                                           | [M-H] <sup>-</sup>  | 131.046216 |
|                                                                                                           | [M+Cl] <sup>-</sup> | 167.022893 |
| <sup>13</sup> C <sup>2</sup> L-Asparagine                                                                 | [M+H] <sup>+</sup>  | 135.067478 |
|                                                                                                           | [M+Na] <sup>+</sup> | 157.049421 |
|                                                                                                           | [M+K] <sup>+</sup>  | 173.023361 |
|                                                                                                           | [M-H] <sup>-</sup>  | 133.052925 |
|                                                                                                           | [M+Cl] <sup>-</sup> | 169.029603 |
| <sup>13</sup> C <sup>3</sup> L-Asparagine                                                                 | [M+H] <sup>+</sup>  | 136.070833 |
|                                                                                                           | [M+Na] <sup>+</sup> | 158.052776 |
|                                                                                                           | [M+K] <sup>+</sup>  | 174.026716 |
|                                                                                                           | [M-H] <sup>-</sup>  | 134.056280 |
|                                                                                                           | [M+Cl] <sup>-</sup> | 170.032958 |
| <sup>13</sup> C <sup>4</sup> L-Asparagine                                                                 | [M+H] <sup>+</sup>  | 137.074188 |
|                                                                                                           | [M+Na] <sup>+</sup> | 159.056130 |
|                                                                                                           | [M+K] <sup>+</sup>  | 175.030070 |
|                                                                                                           | [M-H] <sup>-</sup>  | 135.059635 |
|                                                                                                           | [M+Cl] <sup>-</sup> | 171.036312 |
| <sup>15</sup> N <sup>1</sup> L-Asparagine                                                                 | [M+H] <sup>+</sup>  | 134.057803 |
|                                                                                                           | [M+Na] <sup>+</sup> | 156.039746 |
|                                                                                                           | [M+K] <sup>+</sup>  | 172.013686 |
|                                                                                                           | [M-H] <sup>-</sup>  | 132.043251 |
|                                                                                                           | [M+Cl] <sup>-</sup> | 168.019928 |
| <sup>15</sup> N <sup>2</sup> L-Asparagine                                                                 | [M+H] <sup>+</sup>  | 135.054838 |
|                                                                                                           | [M+Na] <sup>+</sup> | 157.036781 |
|                                                                                                           | [M+K] <sup>+</sup>  | 173.010721 |
|                                                                                                           | [M-H] <sup>-</sup>  | 133.040286 |
|                                                                                                           | [M+Cl] <sup>-</sup> | 169.016963 |
| <b>Proline</b>                                                                                            |                     |            |
| <b>L-Proline</b> ;D-Proline;Acetamidopropanal;<br>4-Amino-2-methylenebutanoic acid;Pterolactam;           | [M+H] <sup>+</sup>  | 116.070605 |
|                                                                                                           | [M+Na] <sup>+</sup> | 138.052548 |
|                                                                                                           | [M+K] <sup>+</sup>  | 154.026488 |
| <sup>13</sup> C <sup>5</sup> L-Proline                                                                    | [M+H] <sup>+</sup>  | 121.087379 |
|                                                                                                           | [M+Na] <sup>+</sup> | 143.069322 |
|                                                                                                           | [M+K] <sup>+</sup>  | 159.043262 |
| <sup>15</sup> N <sup>1</sup> L-Proline                                                                    | [M+H] <sup>+</sup>  | 117.067640 |
|                                                                                                           | [M+Na] <sup>+</sup> | 139.049582 |
|                                                                                                           | [M+K] <sup>+</sup>  | 155.023522 |
| <b>Glycine</b>                                                                                            |                     |            |
| <b>Glycine</b> ;Acetohydroxamic Acid;Ethyl nitrite                                                        | [M+H] <sup>+</sup>  | 76.039305  |
|                                                                                                           | [M+Na] <sup>+</sup> | 98.021247  |
| <sup>13</sup> C <sup>2</sup> Glycine                                                                      | [M+H] <sup>+</sup>  | 78.046015  |
|                                                                                                           | [M+Na] <sup>+</sup> | 100.027957 |
| <b>Ornithine</b>                                                                                          |                     |            |
| <b>Ornithine</b> ;D-Ornithine                                                                             | [M+H] <sup>+</sup>  | 133.097154 |
| <sup>13</sup> C <sup>1</sup> Ornithine                                                                    | [M+H] <sup>+</sup>  | 134.100509 |
| <sup>13</sup> C <sup>5</sup> Ornithine                                                                    | [M+H] <sup>+</sup>  | 138.113928 |
| <b>Leucine</b>                                                                                            |                     |            |
| <b>L-Leucine</b> ;L-Isoleucine;L-Alloisoleucine; L-Norleucine;Aminocaproic acid;Beta-Leucine;D-Leucine;3- | [M+H] <sup>+</sup>  | 132.101905 |
|                                                                                                           | [M+Na] <sup>+</sup> | 154.083848 |
|                                                                                                           | [M+K] <sup>+</sup>  | 170.057788 |

|                                                                                                                                                                                                                                                                                                                                                                    |                                                                                                              |                                                                    |
|--------------------------------------------------------------------------------------------------------------------------------------------------------------------------------------------------------------------------------------------------------------------------------------------------------------------------------------------------------------------|--------------------------------------------------------------------------------------------------------------|--------------------------------------------------------------------|
| Aminocaproic acid;erythro-Isoleucine;6-Deoxyfagomine;N-(2-Hydroxyethyl)-morpholine;                                                                                                                                                                                                                                                                                | [M-H] <sup>-</sup><br>[M+Cl] <sup>-</sup>                                                                    | 130.087352<br>166.064030                                           |
| <sup>13</sup> C <sup>6</sup> L-Leucine                                                                                                                                                                                                                                                                                                                             | [M+H] <sup>+</sup><br>[M+Na] <sup>+</sup><br>[M+K] <sup>+</sup><br>[M-H] <sup>-</sup><br>[M+Cl] <sup>-</sup> | 138.122034<br>160.103977<br>176.077917<br>136.107481<br>172.084159 |
| <sup>15</sup> N <sup>1</sup> L-Leucine                                                                                                                                                                                                                                                                                                                             | [M+H] <sup>+</sup><br>[M+Na] <sup>+</sup><br>[M+K] <sup>+</sup><br>[M-H] <sup>-</sup><br>[M+Cl] <sup>-</sup> | 138.122034<br>160.103977<br>176.077917<br>136.107481<br>172.084159 |
| <b>Ketoleucine</b>                                                                                                                                                                                                                                                                                                                                                 |                                                                                                              |                                                                    |
| <b>Ketoleucine</b> ;2-Methyl-3-ketovaleric acid;3-Methyl-2-oxovaleric acid; 2-Ketohexanoic acid;Mevalonolactone;3-Oxohexanoic acid;Adipate semialdehyde;"5-Ethoxy-4,5-dihydro-2(3H)furanone";Ethyl acetoacetate;Ethyl 3-oxobutanoate;Sherry lactone;"(4S,6S)-3,4,5,6-Tetrahydro-4-hydroxy-6-methyl-2H-pyran-2-one";Acetoin acetate;Methyl levulinate;Pantolactone; | [M-H] <sup>-</sup>                                                                                           | 129.055718                                                         |
| <sup>13</sup> C <sup>6</sup> Ketoleucine                                                                                                                                                                                                                                                                                                                           | [M-H] <sup>-</sup>                                                                                           | 135.075847                                                         |
| <b>Pyroglutamic acid</b>                                                                                                                                                                                                                                                                                                                                           |                                                                                                              |                                                                    |
| <b>Pyroglutamic acid</b> ;Pyrrolidonecarboxylic acid;Pyrroline hydroxycarboxylic acid;N-Acryloylglycine;1-Pyrroline-4-hydroxy-2-carboxylate;5-Oxoprolinate;dimethadione                                                                                                                                                                                            | [M-H] <sup>-</sup>                                                                                           | 128.035317                                                         |
| <sup>13</sup> C <sup>5</sup> Pyroglutamic acid                                                                                                                                                                                                                                                                                                                     | [M-H] <sup>-</sup>                                                                                           | 133.052091                                                         |
| <b>Glutathione</b>                                                                                                                                                                                                                                                                                                                                                 |                                                                                                              |                                                                    |
| <b>Glutathione</b>                                                                                                                                                                                                                                                                                                                                                 | [M+H] <sup>+</sup><br>[M+Na] <sup>+</sup>                                                                    | 308.091082<br>330.073025                                           |
| <sup>13</sup> C <sup>5</sup> Glutathione                                                                                                                                                                                                                                                                                                                           | [M+H] <sup>+</sup><br>[M+Na] <sup>+</sup>                                                                    | 313.107857<br>335.089800                                           |
| <sup>15</sup> N <sup>1</sup> Glutathione                                                                                                                                                                                                                                                                                                                           | [M+H] <sup>+</sup><br>[M+Na] <sup>+</sup>                                                                    | 309.088118<br>331.070060                                           |
| <b>N-Acetyl-L-aspartic acid</b>                                                                                                                                                                                                                                                                                                                                    |                                                                                                              |                                                                    |
| <b>N-Acetyl-L-aspartic acid</b> ;N-Formyl-L-glutamic acid;D-N-(Carboxyacetyl)alanine;2-Amino-3-oxoadipate;Berteroin                                                                                                                                                                                                                                                | [M-H] <sup>-</sup>                                                                                           | 174.040796                                                         |
| <sup>13</sup> C <sup>3</sup> N-Acetyl-L-aspartic acid                                                                                                                                                                                                                                                                                                              | [M-H] <sup>-</sup>                                                                                           | 177.050861                                                         |
| <sup>13</sup> C <sup>4</sup> N-Acetyl-L-aspartic acid                                                                                                                                                                                                                                                                                                              | [M-H] <sup>-</sup>                                                                                           | 178.054215                                                         |
| <sup>15</sup> N <sup>1</sup> N-Acetyl-L-aspartic acid                                                                                                                                                                                                                                                                                                              | [M-H] <sup>-</sup>                                                                                           | 175.037831                                                         |
| <b>N-Formyl-L-glutamic acid</b>                                                                                                                                                                                                                                                                                                                                    |                                                                                                              |                                                                    |
| N-Acetyl-L-aspartic acid; <b>N-Formyl-L-glutamic acid</b> ;D-N-(Carboxyacetyl)alanine;2-Amino-3-oxoadipate;Berteroin                                                                                                                                                                                                                                               | [M-H] <sup>-</sup>                                                                                           | 174.040796                                                         |
| <sup>13</sup> C <sup>5</sup> N-Formyl-L-glutamic acid                                                                                                                                                                                                                                                                                                              | [M-H] <sup>-</sup>                                                                                           | 179.057570                                                         |
| <sup>15</sup> N <sup>1</sup> N-Formyl-L-glutamic acid                                                                                                                                                                                                                                                                                                              | [M-H] <sup>-</sup>                                                                                           | 175.037831                                                         |
| <b>D-Ribulose 5-phosphate/D-Ribose 5-phosphate</b>                                                                                                                                                                                                                                                                                                                 |                                                                                                              |                                                                    |
| <b>D-Ribulose 5-phosphate</b> ;Xylulose 5-phosphate;Ribose 1-phosphate; <b>D-Ribose 5-phosphate</b> ;D-Xylulose 1-phosphate;D-Arabinose 5-phosphate;Beta-L-arabinose 1-phosphate                                                                                                                                                                                   | [M-H] <sup>-</sup>                                                                                           | 231.026430                                                         |
| <sup>13</sup> C <sup>5</sup> D-Ribulose 5-phosphate/ <sup>13</sup> C <sup>5</sup> D-Ribose 5-phosphate                                                                                                                                                                                                                                                             | [M-H] <sup>-</sup>                                                                                           | 236.043205                                                         |
| <b>Sedoheptulose 7-phosphate</b>                                                                                                                                                                                                                                                                                                                                   |                                                                                                              |                                                                    |



|                                                                                                                                                                                                                                                                       |                    |            |
|-----------------------------------------------------------------------------------------------------------------------------------------------------------------------------------------------------------------------------------------------------------------------|--------------------|------------|
| <b>D-Sedoheptulose 7-phosphate</b> ;Sedoheptulose 1-phosphate                                                                                                                                                                                                         | [M-H] <sup>-</sup> | 289.033007 |
| <sup>13</sup> C <sup>5</sup> D-Sedoheptulose 7-phosphate                                                                                                                                                                                                              | [M-H] <sup>-</sup> | 294.049781 |
| <b>Sedoheptulose 1,7-bisphosphate</b>                                                                                                                                                                                                                                 |                    |            |
| <b>Sedoheptulose 1,7-bisphosphate</b>                                                                                                                                                                                                                                 | [M-H] <sup>-</sup> | 368.999337 |
| <sup>13</sup> C <sup>5</sup> Sedoheptulose 1,7-bisphosphate                                                                                                                                                                                                           | [M-H] <sup>-</sup> | 374.016111 |
| <b>Valine</b>                                                                                                                                                                                                                                                         |                    |            |
| <b>L-Valine</b> ;Betaine; Vaporole;N-Methyl-a-aminoisobutyric acid;5-Aminopentanoic acid;Norvaline;Amyl Nitrite                                                                                                                                                       | [M+H] <sup>+</sup> | 118.086255 |
|                                                                                                                                                                                                                                                                       | [M-H] <sup>-</sup> | 116.071702 |
| <sup>13</sup> C <sup>5</sup> L-Valine                                                                                                                                                                                                                                 | [M+H] <sup>+</sup> | 123.103029 |
|                                                                                                                                                                                                                                                                       | [M-H] <sup>-</sup> | 121.088476 |
| <b>alpha-Ketoisovaleric acid</b>                                                                                                                                                                                                                                      |                    |            |
| <b>Alpha-ketoisovaleric acid</b> ;Methylacetoacetic acid;Levulinic acid;2-Oxovaleric acid;2-Methylacetoacetic acid;Glutarate semialdehyde;Ethyl pyruvate;Acetoxyacetone                                                                                               | [M-H] <sup>-</sup> | 115.040068 |
| <sup>13</sup> C <sup>5</sup> Alpha-ketoisovaleric acid                                                                                                                                                                                                                | [M-H] <sup>-</sup> | 120.056841 |
| <b>(S)-3-Hydroxybutyric acid</b>                                                                                                                                                                                                                                      |                    |            |
| <b>(S)-3-Hydroxybutyric acid</b> ;2-Hydroxybutyric acid;(R)-3-Hydroxybutyric acid;(S)-3-Hydroxyisobutyric acid;(R)-3-Hydroxyisobutyric acid;3-Hydroxybutyric acid; 4-Hydroxybutyric acid;Alpha-Hydroxyisobutyric acid;Ethoxyacetic acid;2-Methyl-3-hydroxypropanoate] | [M-H] <sup>-</sup> | 103.040068 |
| <sup>13</sup> C <sup>4</sup> (S)-3-Hydroxybutyric acid                                                                                                                                                                                                                | [M-H] <sup>-</sup> | 108.056842 |
| <b>Propionylcarnitine</b>                                                                                                                                                                                                                                             |                    |            |
| <b>Propionylcarnitine</b>                                                                                                                                                                                                                                             | [M+H] <sup>+</sup> | 218.138685 |
| <sup>13</sup> C <sup>3</sup> Propionylcarnitine                                                                                                                                                                                                                       | [M+H] <sup>+</sup> | 221.148749 |
| <b>Methylmalonic acid</b>                                                                                                                                                                                                                                             |                    |            |
| <b>Methylmalonic acid</b> ; Succinate;"Erythrono-1,4-lactone";Threonolactone                                                                                                                                                                                          | [M-H] <sup>-</sup> | 117.019332 |
| <sup>13</sup> C <sup>3</sup> Methylmalonic acid                                                                                                                                                                                                                       | [M-H] <sup>-</sup> | 120.029397 |
| <sup>13</sup> C <sup>4</sup> Methylmalonic acid                                                                                                                                                                                                                       | [M-H] <sup>-</sup> | 121.032752 |

#### Supplementary Figures

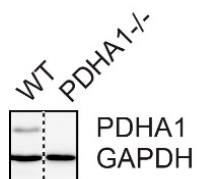

**Figure S1.** Western blot analysis of total lysates from wild type and PDHA1<sup>-/-</sup> HEK293T cells.

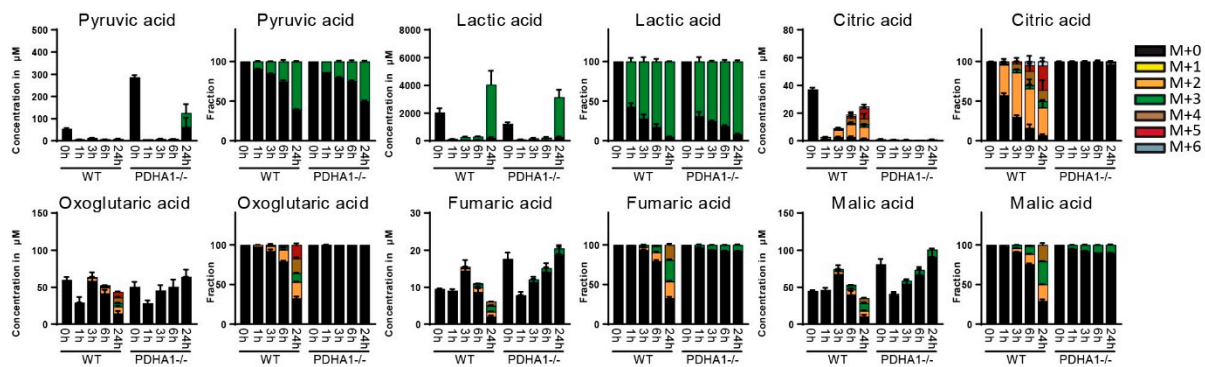

**Figure S2.** Targeted profiling of indicated metabolites in wild type and PDHA1 deficient HEK293T cells cultured in the presence of  $^{13}\text{C}_6$  glucose for 0 h, 1 h, 3 h, 6 h and 24 hours.

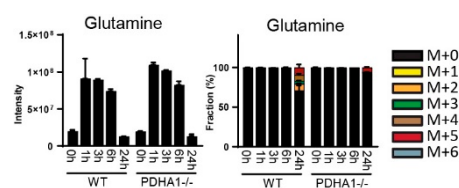

**Figure S3.** Total (labeled and unlabeled) intensity and fractional enrichment of glutamine in medium after 0 h, 1 h, 3 h, 6 h and 24 h incubation with  $^{13}\text{C}_6$  glucose in wild type and PDHA1 deficient HEK293T cells. Isomeric compounds for each component are listed in Table S3.

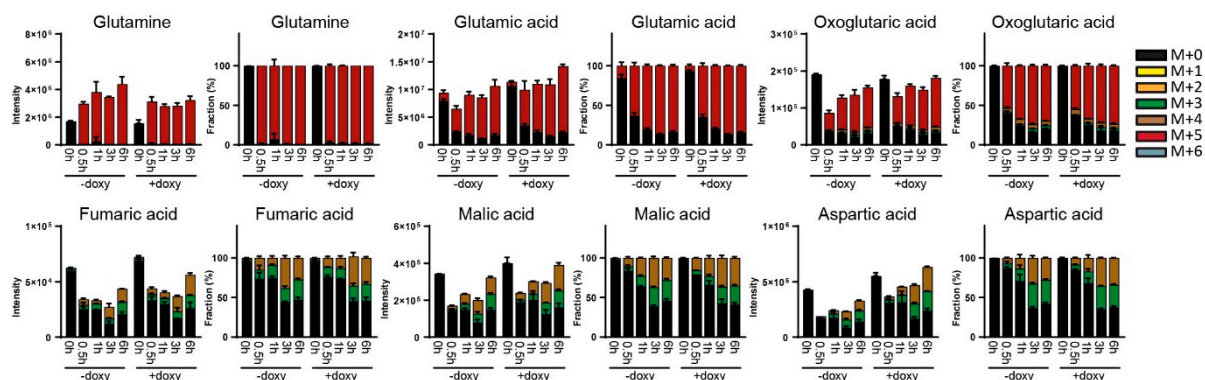

**Figure S4.** Metabolic consequences of overexpression of wild type GLS. Total (labeled and unlabeled) intensity and fraction of TCA cycle intermediates and aspartic acid after 0 h, 0.5 h, 1 h, 3 h and 6 h incubation with  $^{13}\text{C}_5$  glutamine and with/without doxycycline in A549::pIND\_GLS cells. Isomeric compounds for each component are listed in Table S3.
